# Supplementary material
Source: MDPI journal article supplement (https://www.mdpi.com/2571-6980/2/1/7)
Supplement: s1 [file s1 › neuroglia-1326588-supplementary.pdf]

Goggle folder link:

[https://drive.google.com/drive/folders/1UO6UHC8ctPa-eX-SXrn0p2GFCkzFt\\_kg?usp=sharing](https://drive.google.com/drive/folders/1UO6UHC8ctPa-eX-SXrn0p2GFCkzFt_kg?usp=sharing)

Movie S1: The activation of glia with channel rhodopsin in adult *Drosophila* (glia>Chr2 XXL). Upon exposure to blue light the adults lose motor control. After the light is turned off the adults take some time to regain function. Speed is in real time. Adults fed ATR for 2 days and maintained in the dark prior to viewing. Recordings made with IR light along with the blue light exposures.  
<https://youtu.be/eO0g5jTFwrM>

Movie S2: Six adults of the parental line (UAS-ChR2XXL) and two adults expressing channel rhodopsin in glia (glia>Chr2 XXL) when exposed to blue light were all fed ATR for 2 days and maintained in the dark prior to viewing. Speed is in real time. Recordings made with IR light along with the blue light exposures.  
<https://youtu.be/NId7z7m-HrU>

Movie S3: Adults of glia>Chr2 XXL in a glass Petri dish viewed from the top with IR light and a blue LED exposure for 30 s. Only responders to blue light were collected for this movie. The non-responders were allowed to fly away after a brief blue light exposure of 10 s. The ones remaining in the dish were allowed to dark-adapt for 10 min before being recorded. Some adults recovered quickly after the blue light was turned off while others took as long as 3 min. In IR light the adults did not like to fly so the dish was shaken to stimulate the adults to fly.  
<https://youtu.be/Y2hVRb22-XU>

Movie S4: To illustrate the rapid twitches while the adults were recovering from the paralysis a smaller dish was used with a higher magnification of glia>Chr2 XXL. Viewed from the top with IR light and a blue LED exposure for 30 s. Only responders to blue light were collected for this movie. The non-responders were allowed to fly away after a brief blue light exposure of 10 s. The ones remaining in the dish were allowed to dark-adapt for 10 min before being recorded.  
<https://youtu.be/bxZaHHZCeac>

Movie S5: Having a dim white light background promoted the flies to move around on their own without having to mechanically shake the dish as for IR-only exposed adults. It is apparent that a rapid grooming behavior is present when the flies are recovering, and overall movements are slow but rapidly pick up in speed over 5 min as seen after a 30 s blue light is turned off compared to 4 min later.  
<https://youtu.be/HZzSayAm6T8>

Movie S6: The activation of glia with channel rhodopsin in larval *Drosophila* (glia>Chr2 XXL). Larvae were fed ATR for 24 h from second instar stage and maintained in the dark prior to viewing. Recordings made with IR light along with the blue light exposures. Speed is four times normal speed.  
<https://youtu.be/6I7UDpmxi5Y>

Movie 7: Larvae of the parental line (UAS-ChR2XXL) while exposed to blue light. Larvae fed ATR for 24 h from second instar stage and maintained in the dark prior to viewing. Recordings made with IR light along with the blue light exposures. Speed is four times normal speed.  
<https://youtu.be/B-kSYQEXyvk>
